# Supplementary material for: Preparation, Characterization and Anticancer Applications of HAase from Pedobacter heparinus
Source: Research Square preprint supplement (doi:10.21203/rs.3.rs-8556096/v1), 2026-01-27
Supplement: Supplementary file 1 [file 582c8c9f57222f61b79d7e7d.docx]

**Supplementary data**

Table S1. Orthogonal experiment factor level table

|  | considerations | | | |
| --- | --- | --- | --- | --- |
| level (of achievement etc) | Liquid content % | % of inoculations | Time h | Temp℃ |
| A | B | C | D |
| 1 | 50 | 3 | 44 | 15 |
| 2 | 60 | 4 | 48 | 18 |
| 3 | 70 | 5 | 52 | 21 |

Table S2. Orthogonal experimental design and results

| Serial number | Considerations | | | | Enzyme viability (IU/mL) | | |
| --- | --- | --- | --- | --- | --- | --- | --- |
| Liquid volume % A | Inoculum % B | Time (h) C | Temperature (°C) D |
| 1 | 1 | 1 | 1 | 1 | 3.4 | 3.15 | 3.25 |
| 2 | 1 | 2 | 3 | 2 | 2.45 | 2.3 | 2.35 |
| 3 | 1 | 3 | 2 | 3 | 2.8 | 2.65 | 2.85 |
| 4 | 2 | 1 | 3 | 3 | 2.1 | 2.2 | 2.3 |
| 5 | 2 | 2 | 2 | 1 | 3.55 | 3.5 | 3.4 |
| 6 | 2 | 3 | 1 | 2 | 3 | 2.95 | 2.8 |
| 7 | 3 | 1 | 2 | 2 | 2.4 | 2.5 | 2.55 |
| 8 | 3 | 2 | 1 | 3 | 2.45 | 2.5 | 2.4 |
| 9 | 3 | 3 | 3 | 1 | 2.9 | 3.05 | 3.1 |
| K1 | 25.200 | 23.850 | 25.900 | 29.300 |  |  |  |
| K2 | 25.800 | 24.900 | 26.200 | 23.300 |  |  |  |
| K3 | 23.850 | 26.100 | 22.750 | 22.250 |  |  |  |
| k1 | 2.800 | 2.650 | 2.878 | 3.256 |  |  |  |
| k2 | 2.867 | 2.767 | 2.911 | 2.589 |  |  |  |
| k3 | 2.650 | 2.900 | 2.528 | 2.472 |  |  |  |
| R | 0.217 | 0.250 | 0.383 | 0.783 |  |  |  |

Table S3. ANOVA

| Source of variance | Sum of squared deviations | Degrees of Freedom | Mean square | F-value | P-value |
| --- | --- | --- | --- | --- | --- |
| A | 0.221666667 | 2 | 0.110833333 | 12.73404255 | 0.000358029 |
| B | 0.281666667 | 2 | 0.140833333 | 16.18085106 | 0.000095181 |
| C | 0.811666667 | 2 | 0.405833333 | 46.62765957 | 0.000000076 |
| D | 3.215 | 2 | 1.6075 | 184.6914894 | 0.000000000 |
| Inaccuracies | 0.156666667 | 18 | 0.009 |  |  |
| Total |  | 26 |  |  |  |


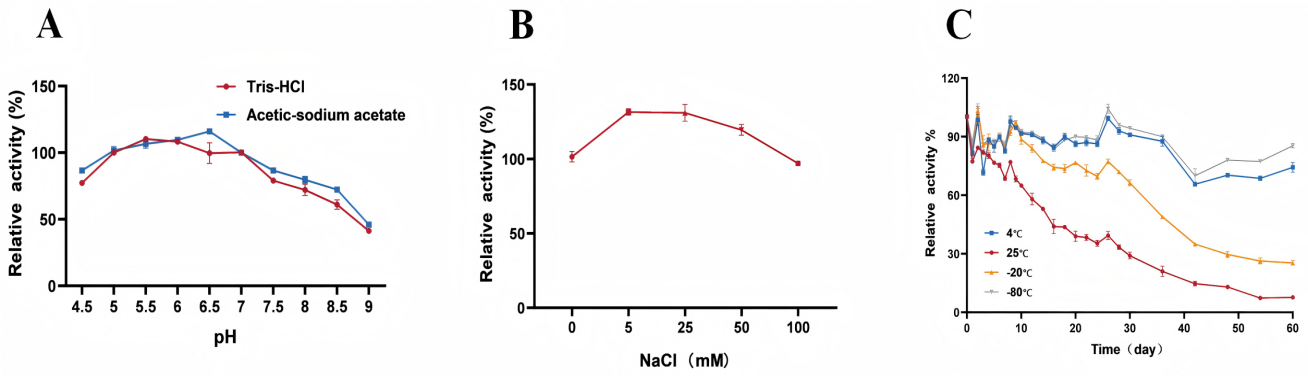


Figure S1. Effect of temperature and pH on Ph-HAase activity and stability. (A) Optimum reaction pH at different buffers; (B)Effect of different concentrations of NaCl on Ph-HAase; (C) Storage stability of Ph-HAase at four temperatures;

Table S4. Kinetic parameters of hydrolysis of different substrates byPh-HAase

| Substrate | HA | CS | DS |
| --- | --- | --- | --- |
| Km (mg/ml) | 0.057 | 0.098 | 0.112 |
| Vmax(A232/min) | 0.128 | 0.114 | 0.033 |


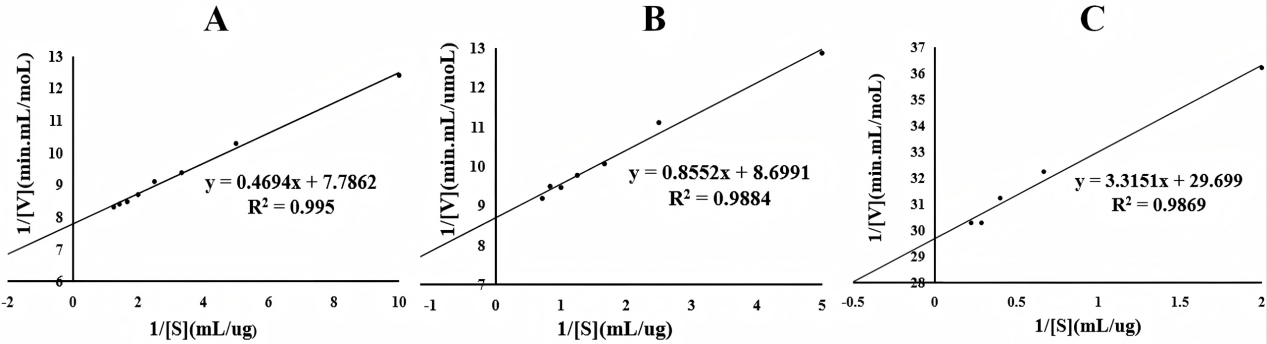


Figure S2. Michaelis-Menten of Ph-HAase for different substrates. (A) HA; (B) CS; (C) DS


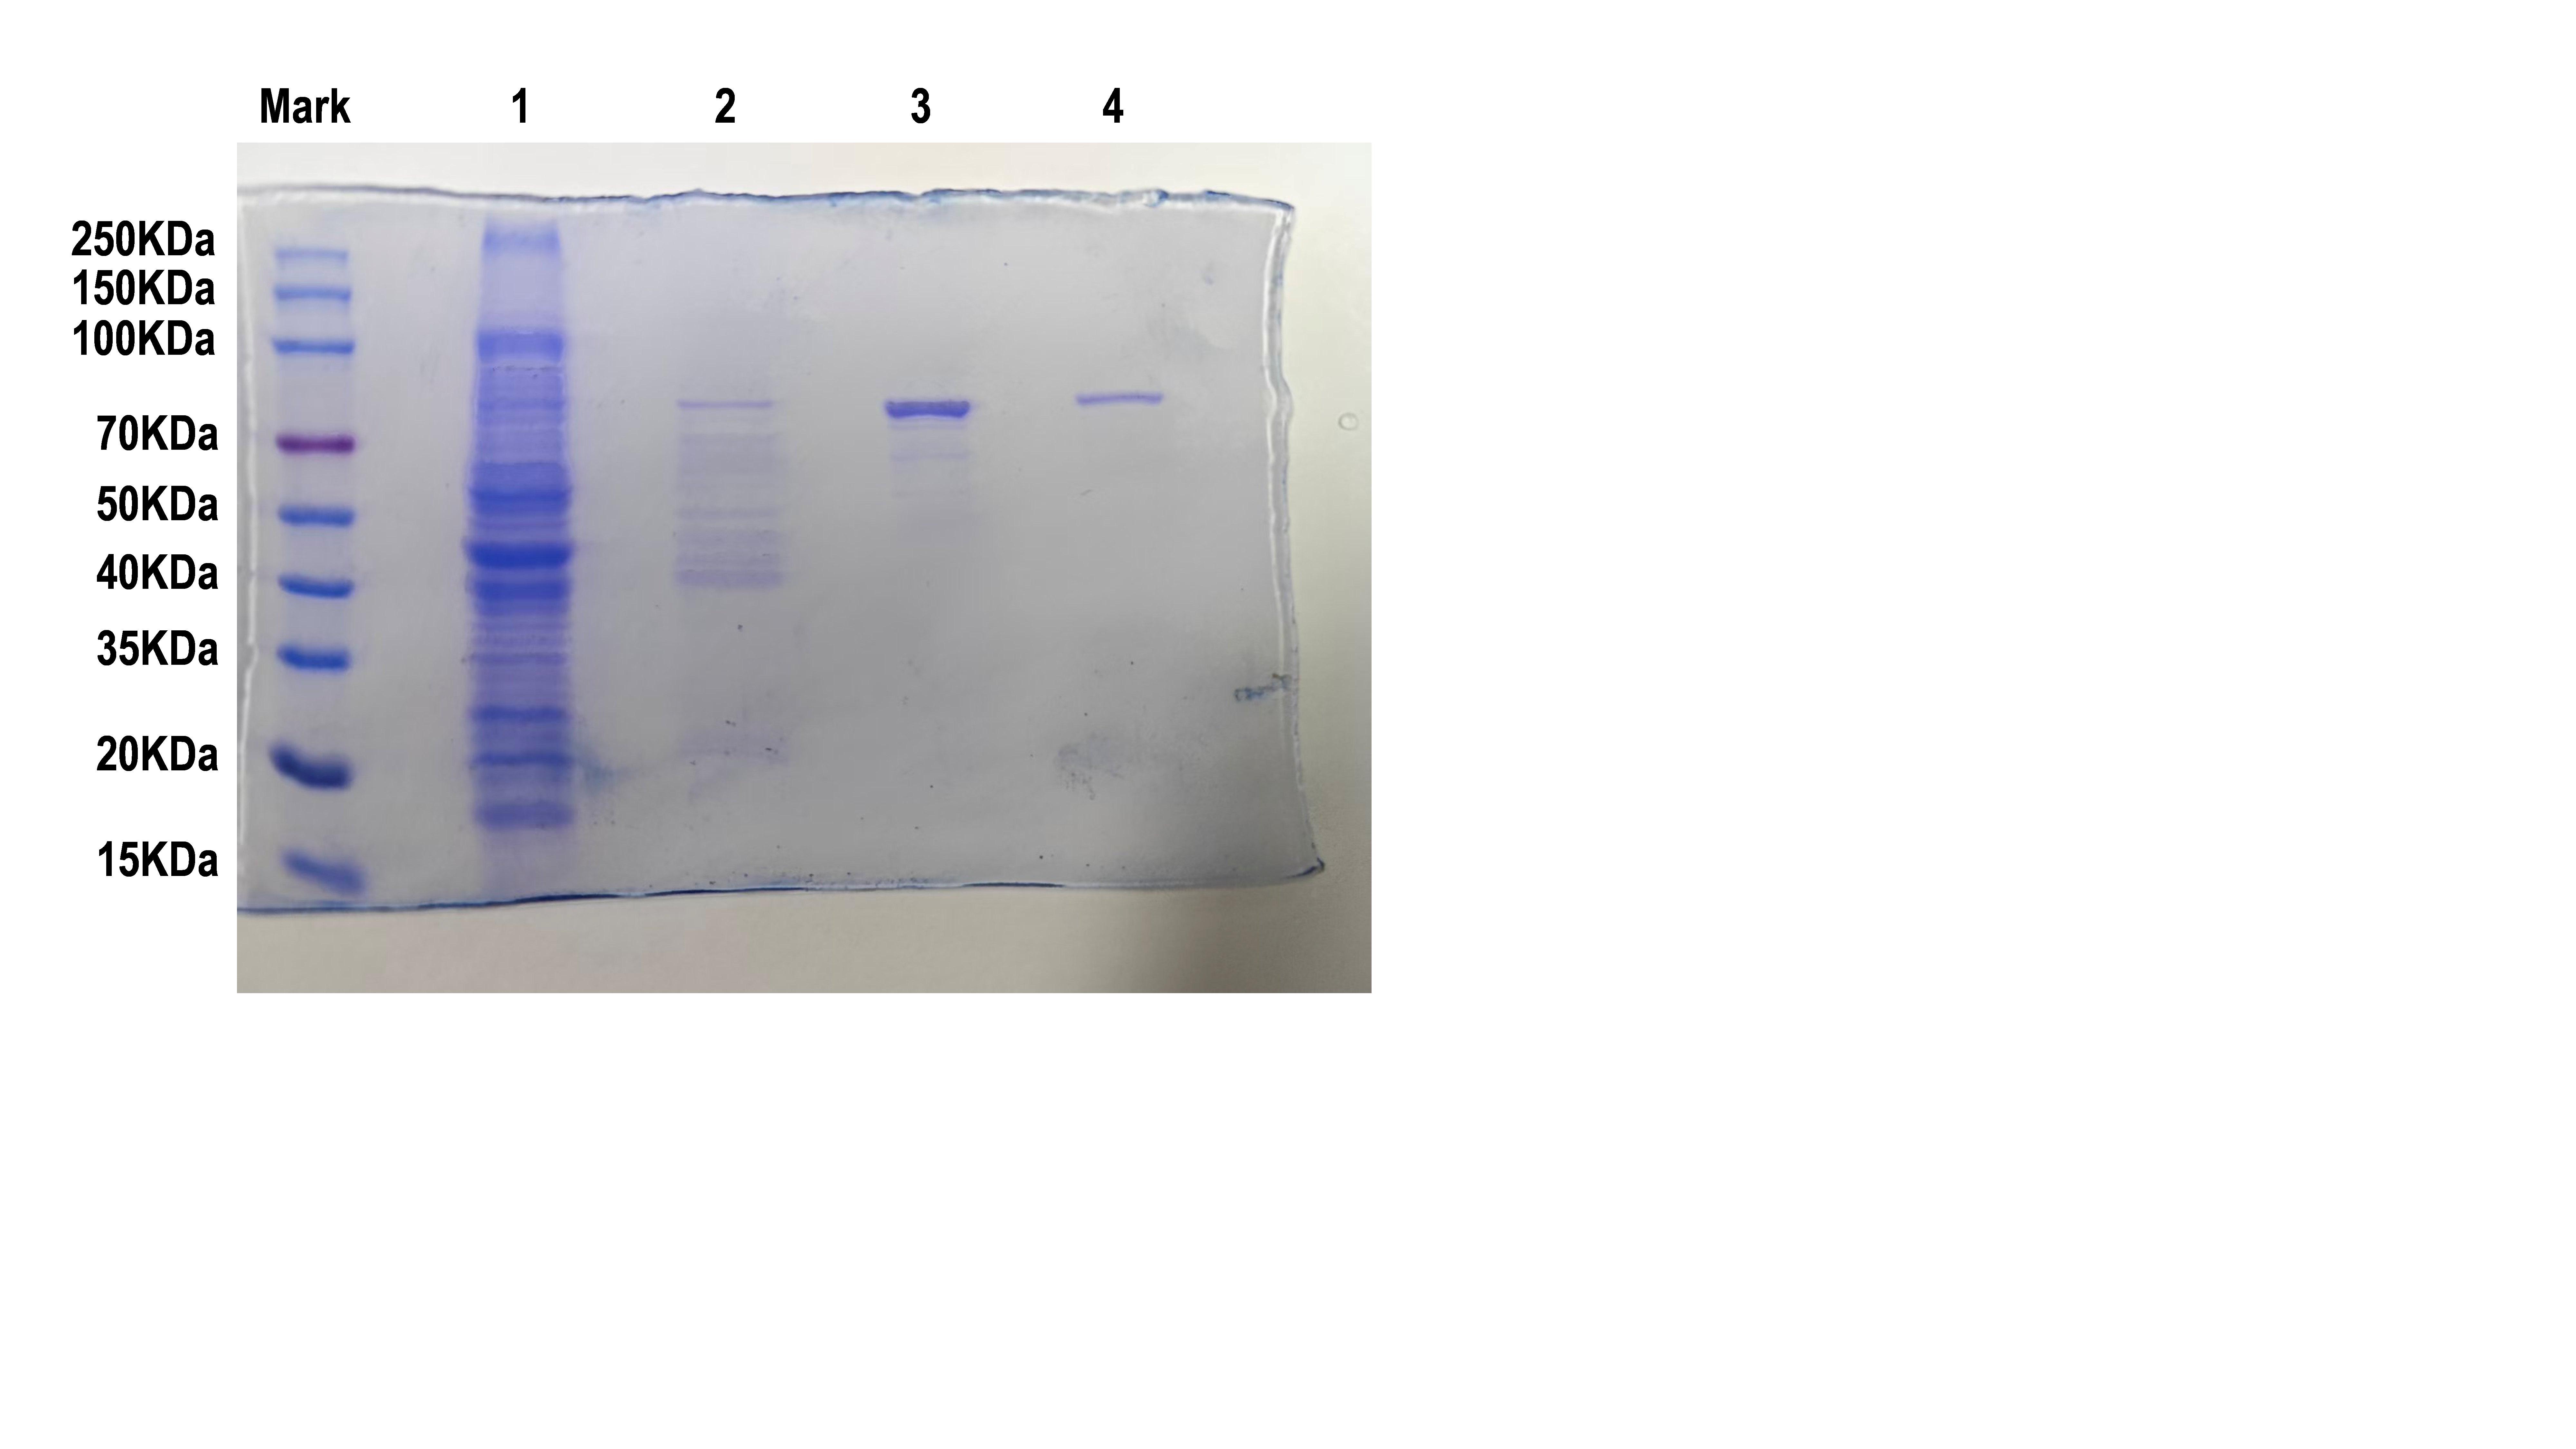


Figure S3 Gel electrophoresis image of Ph-HAase after stepwise purification. (1) Ph-HAase crude enzyme; (2) CellufineTMSulfate elution; (3) UniGel-30CM NaCl gradient elution; (4) UniGel-30CM Tris-HCl linear elution


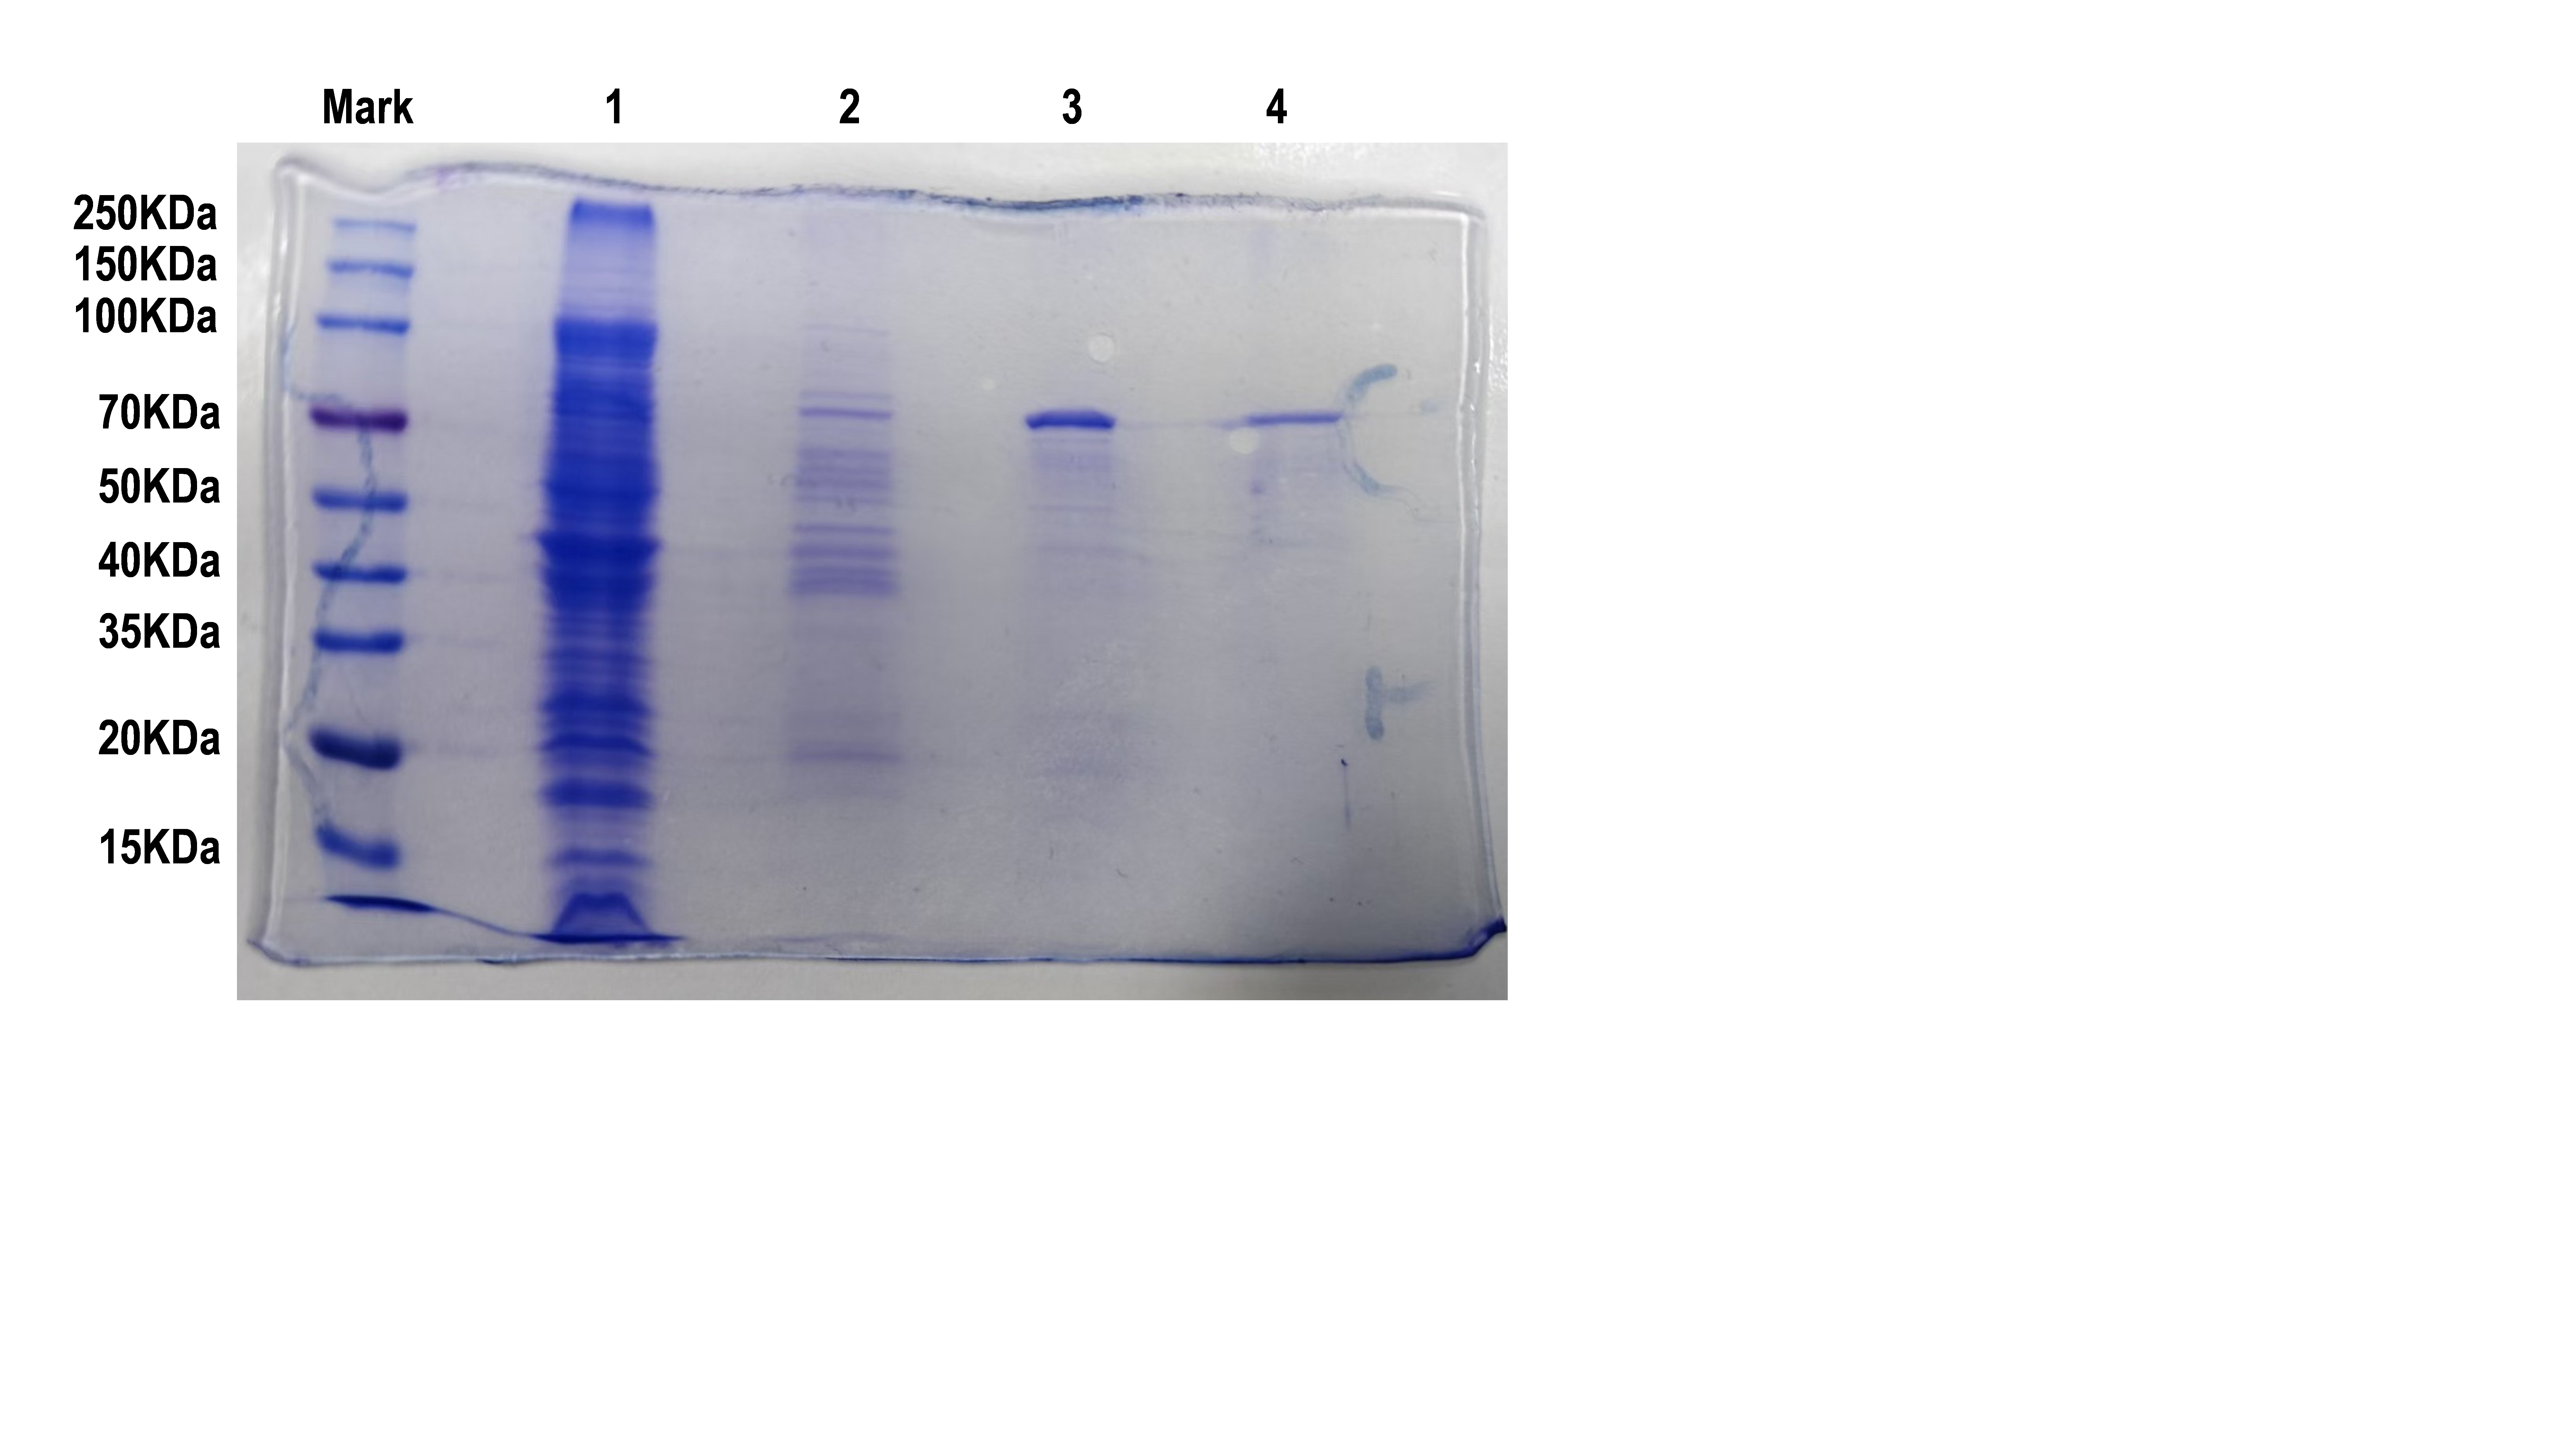


Figure S4 Gel electrophoresis image of Ph-HAase after stepwise purification. (1) Ph-HAase crude enzyme; (2) CellufineTMSulfate elution; (3) UniGel-30CM NaCl gradient elution; (4) UniGel-30CM Tris-HCl linear elution


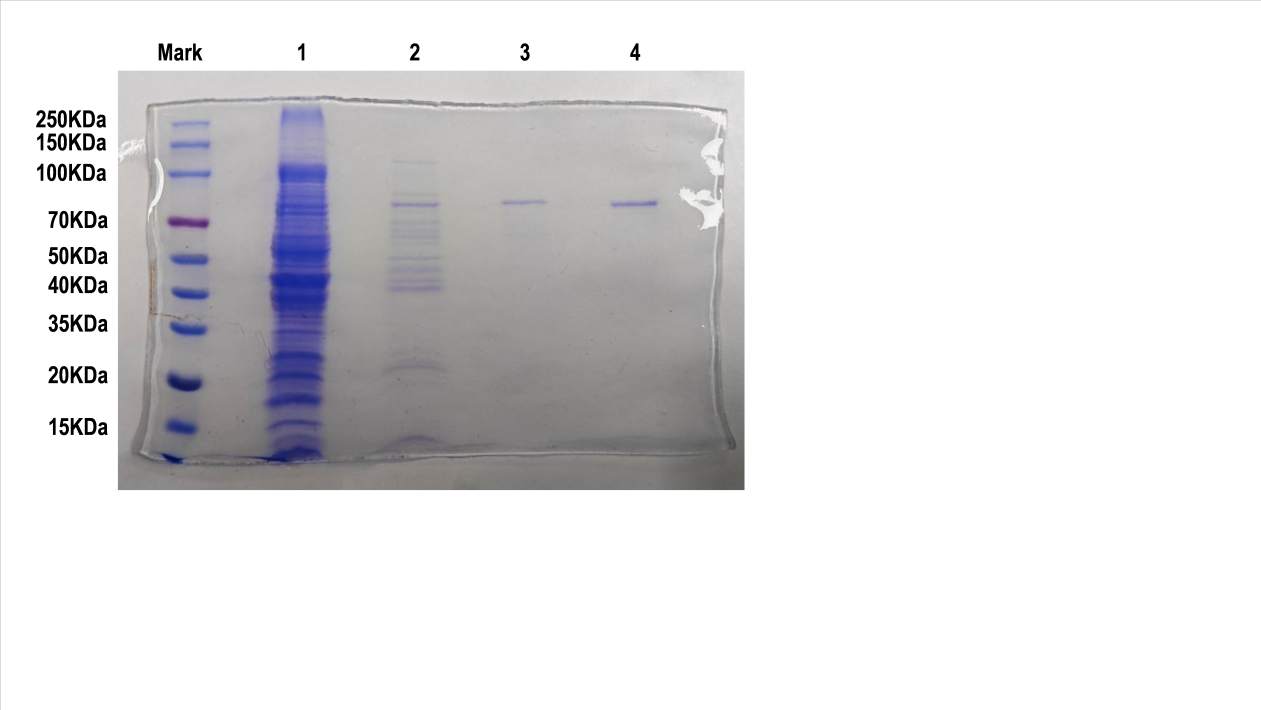


Figure S5 Gel electrophoresis image of Ph-HAase after stepwise purification. (1) Ph-HAase crude enzyme; (2) CellufineTMSulfate elution; (3) UniGel-30CM NaCl gradient elution; (4) UniGel-30CM Tris-HCl linear elution
